# Supplementary material for: Do continuous forms of intra-operative ultrafiltration enhance recovery after adult cardiac surgery with cardiopulmonary bypass? A protocol for systematic review and meta-analysis of randomized controlled trials
Source: Springer Nature journal article supplement (doi:10.1186/s13643-021-01826-y), 2021-10-08
Supplement: MOESM2 [file 19741356]

Database: MEDLINE

- 1 Cardiopulmonary Bypass/
- 2 (cardiopulmonary bypass\* or cardio pulmonary bypass\* or cp bypass\* or cpb).ti,ab,kw,kf.
- 3 heart lung bypass\*.ti,ab,kw,kf.
- 4 lung heart bypass\*.ti,ab,kw,kf.
- 5 or/1-4
- 6 Ultrafiltration/
- 7 Hemofiltration/
- 8 6 or 7
- 9 (continuous or dilutional or subzero or "sub zero" or zero or balance?).ti.
- 10 8 and 9
- 11 ((ultrafiltration or h?emofiltration or filtration or purification) adj2 (continuous or dilutional or subzero or "sub zero" or zero or balance?)).ti,ab,kw,kf.
- 12 (duf or sbuf or s buf or zbuf or z buf).ti,ab,kw,kf.
- 13 or/10-12
- 14 5 and 13
- 15 (non continuous or noncontinuous or conventional or modified or simplified or combined).ti.
- 16 8 and 15
- 17 ((ultrafiltration or h?emofiltration or filtration or purification) adj2 (non continuous or noncontinuous or conventional or modified or simplified or combined)).ti,ab,kw,kf.
- 18 (cuf or muf or smuf).ti,ab,kw,kf.
- 19 or/16-18
- 20 5 and 19
- 21 14 or 20
